# Supplementary material for: Trapped-molecule charge-transfer complexes with huge dipoles: M–C2F6–X (M = Na to Cs, X = Cl to I)
Source: Royal Society of Chemistry journal article supplement (doi:10.1039/b807614f), 2008-01-01
Supplement: b807614f.pdf [file b807614f.pdf]

**Trapped-molecule charge-transfer complexes with huge dipoles:  
M-C<sub>2</sub>F<sub>6</sub>-X (M = Na to Cs, X = Cl to I)**

Fedor Y. Naumkin

**Supplement**

**Table 4 (full) Vibrational frequencies and IR intensities (in cm<sup>-1</sup> and D<sup>2</sup>/Å<sup>2</sup>) of M-C<sub>2</sub>F<sub>6</sub>-X**

| System                               | $\nu$    | I      |
|--------------------------------------|----------|--------|
| C <sub>2</sub> F <sub>6</sub>        | 73.839   | 0.000  |
|                                      | 212.751  | 0.059  |
|                                      | 212.751  | 0.059  |
|                                      | 348.029  | 0.000  |
|                                      | 371.680  | 0.000  |
|                                      | 371.680  | 0.000  |
|                                      | 503.886  | 0.095  |
|                                      | 503.886  | 0.095  |
|                                      | 606.198  | 0.000  |
|                                      | 606.198  | 0.000  |
|                                      | 692.925  | 0.791  |
|                                      | 789.143  | 0.000  |
|                                      | 1101.694 | 6.403  |
|                                      | 1212.148 | 0.000  |
|                                      | 1212.148 | 0.000  |
|                                      | 1236.800 | 12.764 |
| 1236.800                             | 12.764   |        |
| 1457.071                             | 0.000    |        |
| Na-C <sub>2</sub> F <sub>6</sub> -Cl | 29.094   | 0.069  |
|                                      | 29.094   | 0.069  |
|                                      | 72.321   | 0.000  |
|                                      | 79.899   | 0.175  |
|                                      | 79.899   | 0.175  |
|                                      | 120.487  | 1.488  |
|                                      | 199.982  | 0.699  |
|                                      | 228.618  | 0.052  |
|                                      | 228.618  | 0.052  |
|                                      | 355.719  | 0.233  |
|                                      | 372.546  | 0.027  |
|                                      | 372.546  | 0.027  |
|                                      | 499.770  | 0.096  |
|                                      | 499.770  | 0.096  |
|                                      | 599.079  | 0.025  |
|                                      | 599.079  | 0.025  |
|                                      | 685.070  | 1.821  |
|                                      | 777.138  | 0.484  |
| 1072.194                             | 8.774    |        |
| 1135.199                             | 4.614    |        |
| 1135.199                             | 4.614    |        |
| 1282.038                             | 6.164    |        |
| 1282.038                             | 6.164    |        |
| 1416.920                             | 0.000    |        |
| K-C <sub>2</sub> F <sub>6</sub> -Cl  | 24.192   | 0.005  |
|                                      | 26.199   | 0.003  |
|                                      | 74.978   | 0.133  |
|                                      | 75.729   | 0.135  |
|                                      | 76.052   | 0.002  |
|                                      | 101.492  | 1.621  |
| 139.122                              | 0.000    |        |

|                                      |                   |
|--------------------------------------|-------------------|
|                                      | 229.073    0.049  |
|                                      | 229.637    0.050  |
|                                      | 353.823    0.125  |
|                                      | 373.123    0.022  |
|                                      | 373.263    0.022  |
|                                      | 498.764    0.080  |
|                                      | 498.781    0.080  |
|                                      | 600.908    0.025  |
|                                      | 600.977    0.025  |
|                                      | 681.696    1.629  |
|                                      | 777.367    0.410  |
|                                      | 1076.449    8.763 |
|                                      | 1148.915    4.552 |
|                                      | 1150.599    4.533 |
|                                      | 1276.276    6.351 |
|                                      | 1276.406    6.356 |
|                                      | 1423.455    0.001 |
| Rb-C <sub>2</sub> F <sub>6</sub> -Cl | 22.008    0.028   |
|                                      | 22.008    0.028   |
|                                      | 74.216    0.102   |
|                                      | 74.216    0.102   |
|                                      | 77.233    0.006   |
|                                      | 77.785    0.932   |
|                                      | 126.003    0.248  |
|                                      | 229.451    0.047  |
|                                      | 229.451    0.047  |
|                                      | 353.584    0.108  |
|                                      | 373.191    0.020  |
|                                      | 373.191    0.020  |
|                                      | 498.321    0.076  |
|                                      | 498.321    0.076  |
|                                      | 601.237    0.023  |
|                                      | 601.237    0.023  |
|                                      | 681.112    1.636  |
|                                      | 777.817    0.380  |
|                                      | 1076.639    8.862 |
|                                      | 1153.589    4.426 |
|                                      | 1153.589    4.426 |
|                                      | 1274.551    6.412 |
|                                      | 1274.551    6.412 |
|                                      | 1424.373    0.000 |
| Cs-C <sub>2</sub> F <sub>6</sub> -Cl | 19.790    0.065   |
|                                      | 19.790    0.065   |
|                                      | 65.188    0.679   |
|                                      | 72.381    0.095   |
|                                      | 72.381    0.095   |
|                                      | 77.600    0.000   |
|                                      | 123.534    0.379  |
|                                      | 230.440    0.050  |
|                                      | 230.440    0.050  |
|                                      | 353.479    0.111  |
|                                      | 373.642    0.018  |
|                                      | 373.642    0.018  |
|                                      | 498.126    0.072  |
|                                      | 498.126    0.072  |
|                                      | 601.682    0.022  |
|                                      | 601.682    0.022  |
|                                      | 680.696    1.660  |
|                                      | 778.373    0.351  |
|                                      | 1077.936    9.032 |
|                                      | 1157.156    4.295 |
|                                      | 1157.156    4.295 |

Supplementary Material (ESI) for *Physical Chemistry Chemical Physics*  
 This journal is © The Owner Societies 2008

|                                      |                   |
|--------------------------------------|-------------------|
|                                      | 1273.416    6.457 |
|                                      | 1273.416    6.457 |
|                                      | 1425.963    0.000 |
| Cs-C <sub>2</sub> F <sub>6</sub> -Br | 15.802    0.005   |
|                                      | 15.802    0.005   |
|                                      | 52.851    0.582   |
|                                      | 62.439    0.017   |
|                                      | 62.439    0.017   |
|                                      | 78.971    0.000   |
|                                      | 94.958    0.025   |
|                                      | 228.502    0.060  |
|                                      | 228.502    0.060  |
|                                      | 353.876    0.064  |
|                                      | 373.350    0.021  |
|                                      | 373.350    0.021  |
|                                      | 498.325    0.072  |
|                                      | 498.325    0.072  |
|                                      | 601.903    0.021  |
|                                      | 601.903    0.021  |
|                                      | 680.613    1.832  |
|                                      | 779.020    0.360  |
|                                      | 1079.187    9.430 |
|                                      | 1159.452    4.264 |
|                                      | 1159.452    4.264 |
|                                      | 1272.880    6.378 |
|                                      | 1272.880    6.378 |
|                                      | 1429.240    0.001 |
| Cs-C <sub>2</sub> F <sub>6</sub> -I  | 14.524    0.000   |
|                                      | 14.524    0.000   |
|                                      | 47.906    0.461   |
|                                      | 56.263    0.005   |
|                                      | 56.263    0.005   |
|                                      | 76.428    0.000   |
|                                      | 88.402    0.006   |
|                                      | 226.177    0.062  |
|                                      | 226.177    0.062  |
|                                      | 352.365    0.045  |
|                                      | 372.999    0.020  |
|                                      | 372.999    0.020  |
|                                      | 499.026    0.068  |
|                                      | 499.026    0.068  |
|                                      | 602.642    0.018  |
|                                      | 602.642    0.018  |
|                                      | 682.014    1.910  |
|                                      | 780.290    0.360  |
|                                      | 1081.603    9.940 |
|                                      | 1162.645    4.232 |
|                                      | 1162.645    4.232 |
|                                      | 1270.066    5.953 |
|                                      | 1270.066    5.953 |
|                                      | 1433.884    0.003 |
